# Supplementary material for: Extraction performance of Eu3+by using heterocyclic N-donor ligands with different structures in ionic liquids: an experimental and theoretical study
Source: Royal Society of Chemistry journal article supplement (doi:10.1039/c8nj00517f), 2018-01-01
Supplement: c8nj00517f1.pdf [file c8nj00517f1.pdf]

## Electronic Supplementary Material

### Extraction Performance of $\text{Eu}^{3+}$ by Using Heterocyclic N-Donor Ligands with Different Structure in Ionic Liquid: An Experimental and Theoretical Study

Yue Wang<sup>a‡</sup>, Yinyong Ao<sup>b‡</sup>, Weijin Yuan<sup>c</sup>, Jing Peng<sup>a</sup>, Long Zhao<sup>c\*</sup>, Maolin Zhai<sup>a\*</sup>

<sup>a</sup> Beijing National Laboratory for Molecular Sciences, Radiochemistry and Radiation Chemistry Key Laboratory of Fundamental Science, the Key Laboratory of Polymer Chemistry and Physics of the Ministry of Education, College of Chemistry and Molecular Engineering, Peking University, Beijing 100871, P. R. China.

\*E-mail: mlzhai@pku.edu.cn

<sup>b</sup> Institute of Nuclear Physics and Chemistry, China Academy of Engineering Physics, Mianyang 621900, P. R. China.

<sup>c</sup> Institute of Applied Electromagnetic Engineering, Huazhong University of Science and Technology, Wuhan 430074, P. R. China

\*E-mail: zhaolong@hust.edu.cn

‡ These authors contributed equally to this work.

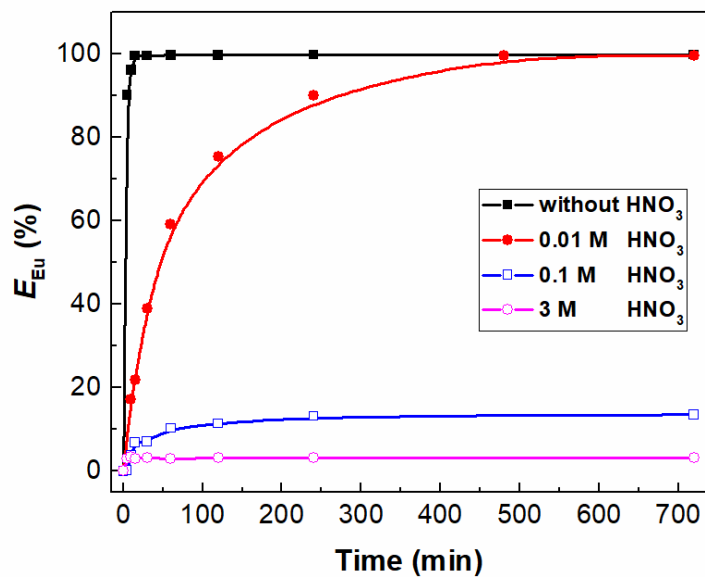

**Fig. S1** Influence of extraction time and nitric acid concentration on  $E_{Eu}$  of CA-BTP/[C<sub>2</sub>mim][NTf<sub>2</sub>] system.

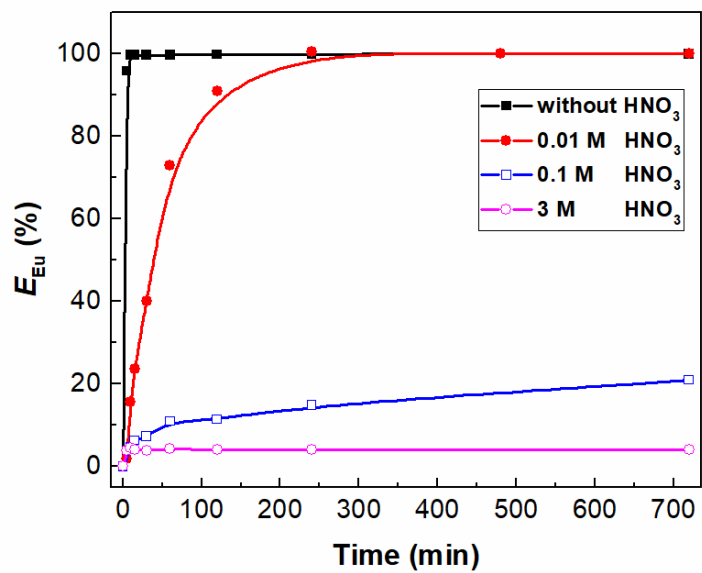

**Fig. S2** Influence of extraction time and nitric acid concentration on  $E_{Eu}$  of CA-BTPhen/[C<sub>2</sub>mim][NTf<sub>2</sub>] system.

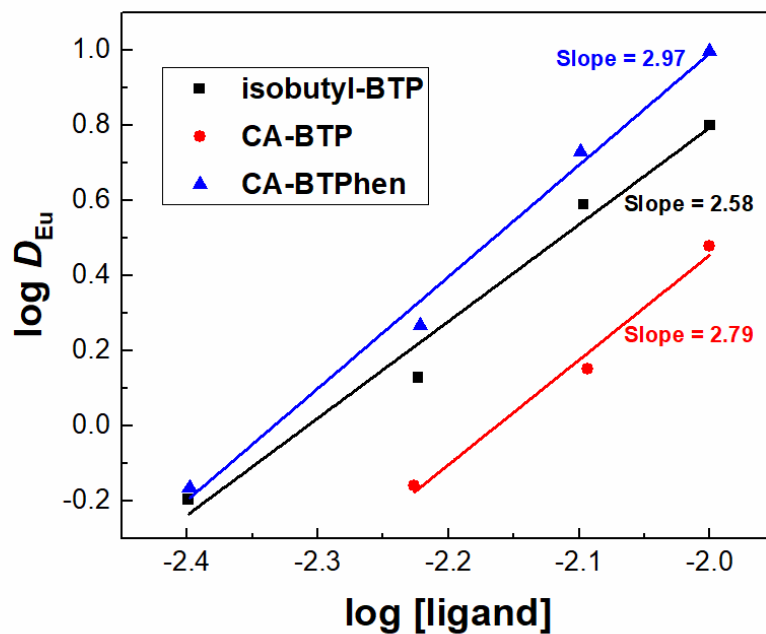

**Fig. S3** Variations in  $\log D_{Eu}$  as a function of  $\log [\text{ligand}]$  in  $[\text{C}_2\text{mim}][\text{NTf}_2]$  ( $[\text{HNO}_3] = 0.01 \text{ M}$ )

Coordination in aqueous phase ( $\Delta G_{aq}$ , 298.15 K,  $\text{kJ}\cdot\text{mol}^{-1}$ )

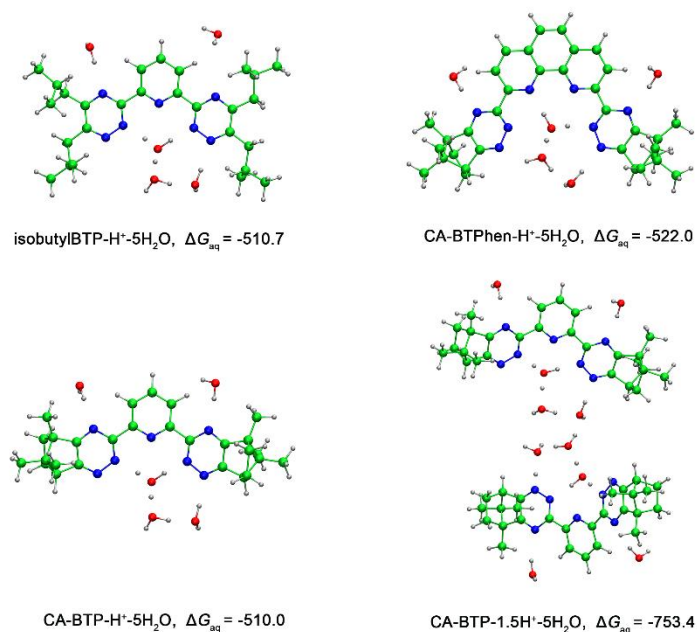

**Fig. S4** Optimized structures of isobutyl-BTP- $\text{H}^+$ - $5\text{H}_2\text{O}$ , CA-BTPhen- $\text{H}^+$ - $5\text{H}_2\text{O}$ , CA-BTP- $\text{H}^+$ - $5\text{H}_2\text{O}$  and CA-BTP- $1.5\text{H}^+$ - $5\text{H}_2\text{O}$ . Green, white, red, blue spheres represent C, H, O and N, respectively.
